# Supplementary material for: The Role of Hyaluronic Acid for Soft Tissue Indications: A Systematic Review and Meta-Analysis
Source: PubMed Central journal article supplement (PMC9808833; doi:10.1177/19417381211073316), 2022-02-03

## ONLINE APPENDICES

### Appendix 1. Search Strategy

| <b>MEDLINE: 1490 studies</b>                                                                                                                                                                                                                                                                                                                                                                                                                                                                                                                                                                                                                                                                                                                                            | <b>EMBASE: 2407 studies</b>                                                                                                                                                                                                                                                                                                                                                                                                                                                                                                                                                                                                                                                                                                                                            | <b>PUBMED: 420 studies</b>                                                                                                                                                                                                                                                                                                                                                                                                                                                                                                                                                                   | <b>COCHRANE: 2613 studies</b>                                                                                                                                                                                                                                                                                                                                                                                                                                                                                                                                                             |
|-------------------------------------------------------------------------------------------------------------------------------------------------------------------------------------------------------------------------------------------------------------------------------------------------------------------------------------------------------------------------------------------------------------------------------------------------------------------------------------------------------------------------------------------------------------------------------------------------------------------------------------------------------------------------------------------------------------------------------------------------------------------------|------------------------------------------------------------------------------------------------------------------------------------------------------------------------------------------------------------------------------------------------------------------------------------------------------------------------------------------------------------------------------------------------------------------------------------------------------------------------------------------------------------------------------------------------------------------------------------------------------------------------------------------------------------------------------------------------------------------------------------------------------------------------|----------------------------------------------------------------------------------------------------------------------------------------------------------------------------------------------------------------------------------------------------------------------------------------------------------------------------------------------------------------------------------------------------------------------------------------------------------------------------------------------------------------------------------------------------------------------------------------------|-------------------------------------------------------------------------------------------------------------------------------------------------------------------------------------------------------------------------------------------------------------------------------------------------------------------------------------------------------------------------------------------------------------------------------------------------------------------------------------------------------------------------------------------------------------------------------------------|
| <p>Strategy:</p> <ol style="list-style-type: none"> <li>1. exp Hyaluronic Acid/ or hyal*.ti,ab. or HA.ti,ab.</li> <li>2. platelet rich plasma.ti,ab. or exp Platelet-Rich Plasma/ or PRP.ti,ab.</li> <li>3. exp Cortisone/ or cortisone.ti,ab. or corticosteroid.ti,ab. or exp Glucocorticoid/ or glucocorticoid.ti,ab. or kenalog.ti,ab. or triamcinolone.ti,ab. or tramcinolone.ti,ab. or depomedrol.ti,ab. or betamethasone.ti,ab. or methylprednisolone.ti,ab. or aristospan.ti,ab. or celstone.ti,ab. or corticosteroid shot.ti,ab. or exp Triamcinolone Acetonide/ or exp Methylprednisolone/ or exp Betamethasone/</li> <li>4. (viscosup* or viskosup*).ti,ab.</li> <li>5. orthovisc*.ti,ab.</li> <li>6. synvisc*.ti,ab.</li> <li>7. monovisc*.ti,ab.</li> </ol> | <p>Strategy:</p> <ol style="list-style-type: none"> <li>1. exp Hyaluronic Acid/ or hyal*.ti,ab. or HA.ti,ab.</li> <li>2. platelet rich plasma.ti,ab. or exp Platelet-Rich Plasma/ or PRP.ti,ab.</li> <li>3. ortisone.ti,ab. or exp cortisone/ or glucocorticoid.ti,ab. or exp glucocorticoid/ or corticosteroid.ti,ab. or kenalog.ti,ab. or cortisone shot.ti,ab. or triamcinolone.ti,ab. or tramcinolone.ti,ab. or betamethasone.ti,ab. or depomedrol.ti,ab. or aristospan.ti,ab. or celestone.ti,ab. or methylprednisolone.ti,ab. or exp methylprednisolone acetate/ or exp triamcinolone/ or exp triamcinolone acetate/ or exp triamcinolone hexacetate/ or exp betamethasone/</li> <li>4. (viscosup* or viskosup*).ti,ab.</li> <li>5. orthovisc*.ti,ab.</li> </ol> | <p>Strategy:</p> <p>Search: (((synvisc OR orthovisc OR monovisc OR durolane OR viscosupplementati on OR viskosupplementati on OR hyaluronic acid OR HA OR hylan OR hyaluron OR platelet-rich plasma OR PRP OR cortisone OR glucocorticoid OR kenalog OR cortisone shot OR triamcinolone or tramcinolone OR depomedrol OR betamethasone OR methylprednisolone OR aristospan OR celestone OR corticosteroid) AND ((((((randomly OR random OR randomized OR trial OR compare OR comparative OR versus) OR ("clinical trial"[Publication Type])) OR ("controlled clinical trial"[Publication</p> | <p>Strategy:</p> <p>(bursitis OR impingement or tendinopathy OR contusions OR tear OR rupture OR strains OR sprains OR Ligaments OR tendons OR muscle OR soft tissue OR knee OR ankle OR foot OR shoulder OR hip) AND (injection) AND (synvisc OR orthovisc OR monovisc OR durolane OR viscosupplementati on OR viskosupplementati on OR hyaluronic acid OR HA OR hylan OR hyaluron OR platelet-rich plasma OR PRP OR cortisone OR glucocorticoid OR kenalog OR cortisone shot OR triamcinolone or tramcinolone OR depomedrol OR betamethasone OR methylprednisolone OR aristospan OR</p> |

|                                                                                                                                                                                                                                                                                                                                                                                                                                                                                                                                                                                                                                                                                                                                                                      |                                                                                                                                                                                                                                                                                                                                                                                                                                                                                                                                                                                                                                                                                                                                     |                                                                                                                                                                                                                                                                                                                                                                                                                                                               |                                     |
|----------------------------------------------------------------------------------------------------------------------------------------------------------------------------------------------------------------------------------------------------------------------------------------------------------------------------------------------------------------------------------------------------------------------------------------------------------------------------------------------------------------------------------------------------------------------------------------------------------------------------------------------------------------------------------------------------------------------------------------------------------------------|-------------------------------------------------------------------------------------------------------------------------------------------------------------------------------------------------------------------------------------------------------------------------------------------------------------------------------------------------------------------------------------------------------------------------------------------------------------------------------------------------------------------------------------------------------------------------------------------------------------------------------------------------------------------------------------------------------------------------------------|---------------------------------------------------------------------------------------------------------------------------------------------------------------------------------------------------------------------------------------------------------------------------------------------------------------------------------------------------------------------------------------------------------------------------------------------------------------|-------------------------------------|
| <p>8. 1 or 2 or 3 or 4 or 5 or 6 or 7</p> <p>9. inject*.ti,ab.</p> <p>10. 8 and 9</p> <p>11. clinical trial.ti,ab. or exp Clinical Trial/</p> <p>12. controlled clinical trial.ti,ab. or exp Controlled Clinical Trial/</p> <p>13. randomized controlled trial.ti,ab. or exp Randomized Controlled Trial/</p> <p>14. exp Randomized Controlled Trials as Topic/ or random*.ti,ab.</p> <p>15. clinical trials as topic.mp. or exp Clinical Trials as Topic/</p> <p>16. placebo.ti,ab.</p> <p>17. trial*.ti,ab.</p> <p>18. Compar*.ti,ab.</p> <p>19. versus.ti,ab.</p> <p>20. 11 or 12 or 13 or 14 or 15 or 16 or 17 or 18 or 19</p> <p>21. exp Ligaments/ or ligament*.ti,ab.</p> <p>22. exp Tendons/ or tendon*.ti,ab.</p> <p>23. muscle*.ti,ab. or exp Muscles/</p> | <p>6. synvisc*.ti,ab.</p> <p>7. monovisc.ti,ab.</p> <p>8. 1 or 2 or 3 or 4 or 5 or 6 or 7</p> <p>9. inject*.ti,ab.</p> <p>10. 8 and 9</p> <p>11. clinical trial.ti,ab. or exp Clinical Trial/</p> <p>12. controlled clinical trial.ti,ab. or exp Controlled Clinical Trial/</p> <p>13. randomized controlled trial.ti,ab. or exp Randomized Controlled Trial/</p> <p>14. exp Randomized Controlled Trials as Topic/ or random*.ti,ab.</p> <p>15. clinical trials as topic.mp. or exp Clinical Trials as Topic/</p> <p>16. placebo.ti,ab.</p> <p>17. trial*.ti,ab.</p> <p>18. compar*.ti,ab.</p> <p>19. versus.ti,ab.</p> <p>20. 11 or 12 or 13 or 14 or 15 or 16 or 17 or 18 or 19</p> <p>21. exp Ligament/ or ligament*.ti,ab.</p> | <p>Type])) OR ("equivalence trial"[Publication Type])) OR ("pragmatic clinical trial"[Publication Type])) OR ("randomized controlled trial"[Publication Type])) AND (bursitis OR impingement or tendinopathy OR contusions OR tear OR rupture OR strains OR sprains OR Ligaments OR tendons OR muscle OR soft tissue OR knee OR ankle OR foot OR shoulder OR hip)) AND (injection)) AND (("2020/02/24"[Date - Publication] : "3000"[Date - Publication]))</p> | <p>celestone OR corticosteroid)</p> |
|----------------------------------------------------------------------------------------------------------------------------------------------------------------------------------------------------------------------------------------------------------------------------------------------------------------------------------------------------------------------------------------------------------------------------------------------------------------------------------------------------------------------------------------------------------------------------------------------------------------------------------------------------------------------------------------------------------------------------------------------------------------------|-------------------------------------------------------------------------------------------------------------------------------------------------------------------------------------------------------------------------------------------------------------------------------------------------------------------------------------------------------------------------------------------------------------------------------------------------------------------------------------------------------------------------------------------------------------------------------------------------------------------------------------------------------------------------------------------------------------------------------------|---------------------------------------------------------------------------------------------------------------------------------------------------------------------------------------------------------------------------------------------------------------------------------------------------------------------------------------------------------------------------------------------------------------------------------------------------------------|-------------------------------------|

|                                                                          |                                                              |  |  |
|--------------------------------------------------------------------------|--------------------------------------------------------------|--|--|
| 24. (soft tissue or soft-tissue).ti,ab.                                  | 22. exp Tendon/ or tendon*.ti,ab.                            |  |  |
| 25. sprains.ti,ab.                                                       | 23. muscle.ti,ab. or exp Muscle/                             |  |  |
| 26. strains.ti,ab.                                                       | 24. (soft tissue or soft-tissue).ti,ab.                      |  |  |
| 27. exp "Sprains and Strains"/                                           | 25. sprain.ti,ab. or exp sprain/                             |  |  |
| 28. contusion.ti,ab. or exp Contusions/                                  | 26. muscle strain.ti,ab. or exp muscle strain/               |  |  |
| 29. exp Tendinopathy/ or tendin*.ti,ab.                                  | 27. contusion.ti,ab. or exp Contusion/                       |  |  |
| 30. bursitis.ti,ab. or exp Bursitis/                                     | 28. exp Tendinitis/ or tendin*.ti,ab.                        |  |  |
| 31. (tear* or rupture*).ti,ab.                                           | 29. bursitis.ti,ab. or exp Bursitis/                         |  |  |
| 32. impingement*.ti,ab.                                                  | 30. (tear or rupture).ti,ab.                                 |  |  |
| 33. 21 or 22 or 23 or 24 or 25 or 26 or 27 or 28 or 29 or 30 or 31 or 32 | 31. impingement*.ti,ab.                                      |  |  |
| 34. 10 and 20 and 33                                                     | 32. 21 or 22 or 23 or 24 or 25 or 26 or 27 or 28 or 29 or 30 |  |  |
| 35. limit 34 to humans                                                   | 33. 10 and 20 and 32                                         |  |  |
|                                                                          | 34. limit 33 to humans                                       |  |  |

## Appendix 2: Functional Outcomes <6 weeks, Constant Scores, Mean Difference (MD)

| Study or Subgroup | Hyaluronic acid |      |       | Control |       |       | Weight | Mean Difference<br>IV, Fixed, 95% CI | Mean Difference<br>IV, Fixed, 95% CI |
|-------------------|-----------------|------|-------|---------|-------|-------|--------|--------------------------------------|--------------------------------------|
|                   | Mean            | SD   | Total | Mean    | SD    | Total |        |                                      |                                      |
| Cal 2018          | 64.6            | 2.54 | 44    | 57.9    | 4.73  | 47    | 90.8%  | 6.70 [5.15, 8.25]                    |                                      |
| Chou 2010         | 72.5            | 16.5 | 25    | 72.4    | 11.75 | 26    | 3.5%   | 0.10 [-7.79, 7.99]                   |                                      |
| Penning 2012      | 73.7            | 15.6 | 48    | 77.8    | 16.3  | 54    | 5.7%   | -4.10 [-10.29, 2.09]                 |                                      |
| Total (95% CI)    |                 |      | 117   |         |       | 127   | 100.0% | 5.86 [4.38, 7.33]                    |                                      |

Heterogeneity:  $\text{Chi}^2 = 13.11$ ,  $\text{df} = 2$  ( $P = 0.001$ );  $I^2 = 85\%$   
Test for overall effect:  $Z = 7.79$  ( $P < 0.00001$ )

-20    -10    0    10    20  
Favours [Control]    Favours [HA]

### Appendix 3: Functional Outcomes <6 weeks, Standardized Mean Difference

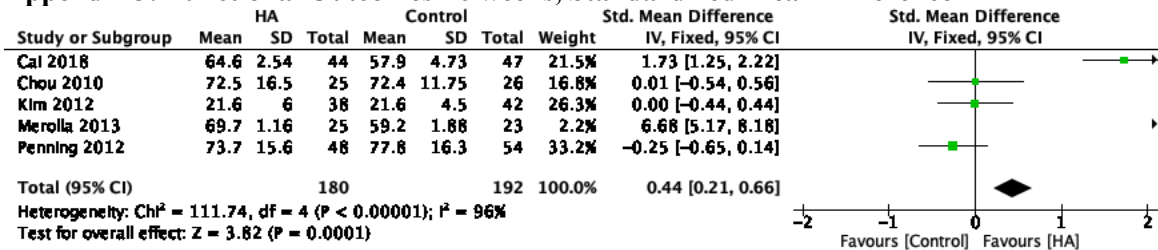

### Appendix 4: HA vs. Saline – all indications - < 6 weeks, VAS, Mean Difference

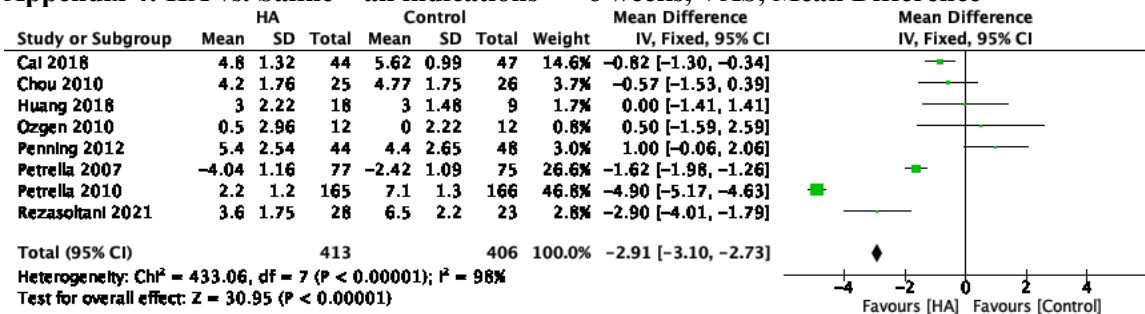

### Appendix 5: Funnel Plot

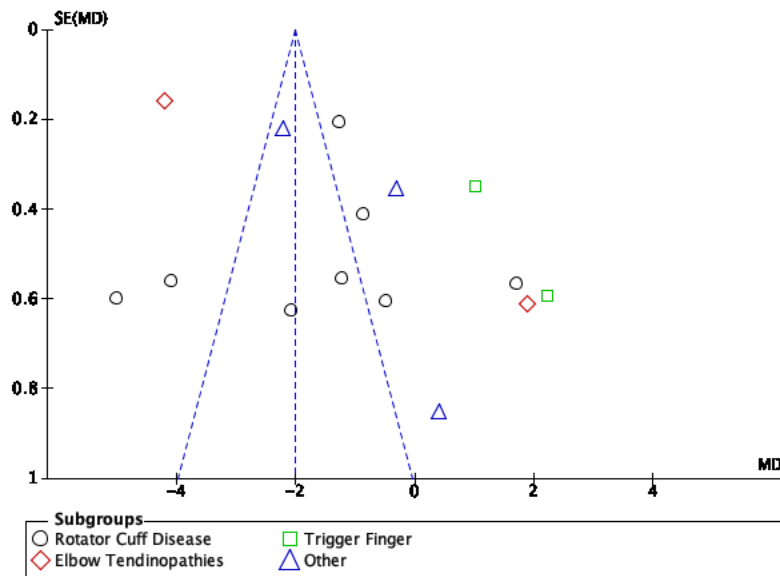

### Appendix 6: Pain > 12 weeks, Mean Difference, VAS Score

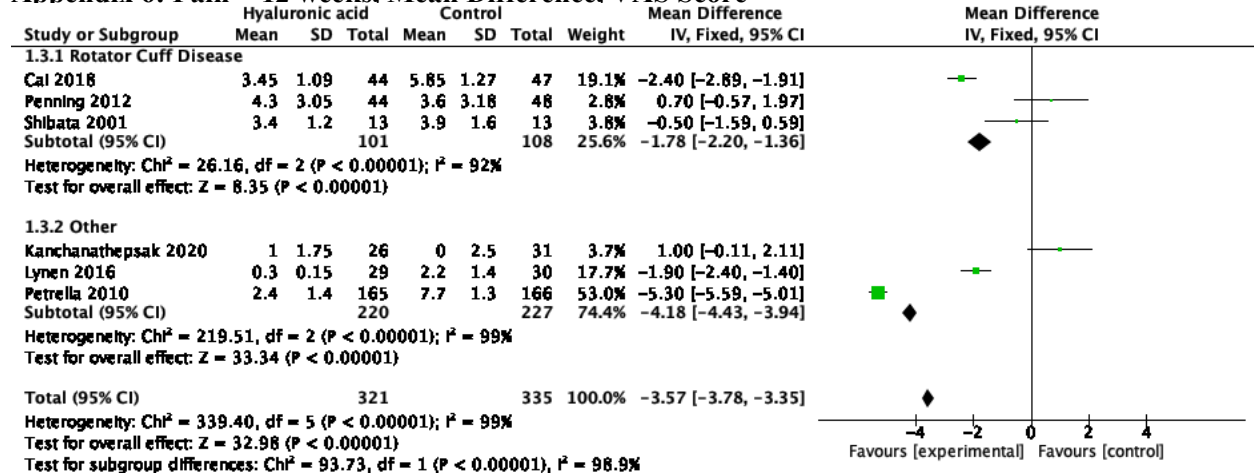

### Appendix 7: Functional Outcomes >6 weeks, <=12 weeks Constant Scores, Mean Difference (MD)

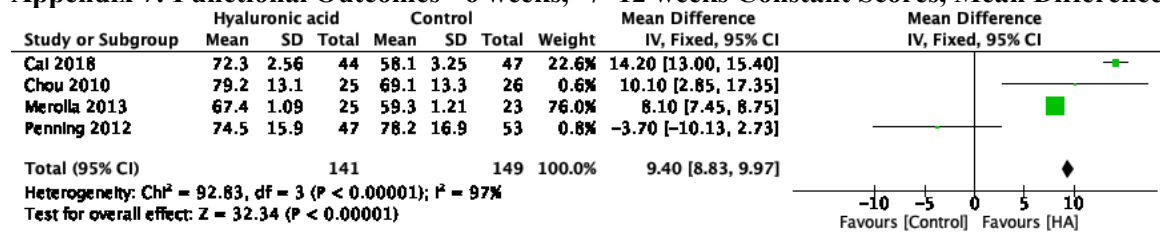

Supplement: sj-pdf-1-sph-10.1177_19417381211073316.pdf [file sj-pdf-1-sph-10.1177_19417381211073316.pdf]
